# Supplementary material for: Untargeted MS-Based Metabolomics Analysis of the Responses to Drought Stress in Quercus ilex L. Leaf Seedlings and the Identification of Putative Compounds Related to Tolerance
Source: MDPI journal article supplement (doi:10.3390/f13040551), 2022-03-31
Supplement: s1 [file s1]

**Supplementary Materials:** The following are available online at [www.mdpi.com/xxx/s1](http://www.mdpi.com/xxx/s1), **Table S1.** (A) List of total metabolites obtained in three biological replicates of *Q. ilex* leaf seedlings under drought conditions at two sampling times (days 17 and 24), showing the mass-to-charge ratio ( $m/z$ ), retention time, and abundance. (B) List of annotated variable metabolites ( $p\text{-value} < 0.05$  in Kruskal-Wallis's test) showing the ID, neutral mass (Da), retention time (min) and description.

**Excel document attached.**

**Table S2.** List of enzymes involved in the phenolics metabolism identified at the transcriptomic, proteomic and metabolomic levels in *Q. ilex*. The presence of the enzyme is shown with a “x”.

|                                                       | EC         | Transcript |           | Protein   |           | Susbtrate |           |
|-------------------------------------------------------|------------|------------|-----------|-----------|-----------|-----------|-----------|
|                                                       |            | Day<br>17  | Day<br>24 | Day<br>17 | Day<br>24 | Day<br>17 | Day<br>24 |
| Phenylpropanoids and derivatives                      |            |            |           |           |           |           |           |
| Phenylalanine ammonia-lyase                           | 4.3.1.24   | x          | x         | x         | x         |           |           |
| 4-coumarate CoA ligase                                | 6.2.1.12   | x          | x         | x         | x         |           |           |
| Caffeic acid 3-O-methyltransferase                    | 2.1.1.68   | x          | x         | x         | x         |           |           |
| Ferulate 5-hydroxylase                                | 1.14.-.-   | x          | x         |           |           |           |           |
| Caffeoyl-CoA O-methyltransferase                      | 2.1.1.104  | x          | x         |           |           |           |           |
| Cinnamate 4-hydroxylase                               | 1.14.14.91 | x          | x         | x         | x         |           |           |
| Coumarate 3-hydroxylase                               | 1.14.13.-  | x          | x         | x         |           |           |           |
| Shikimate O-hydroxycinnamoyltransferase               | 2.3.1.133  | x          | x         |           |           |           |           |
| p-coumaroyl ester 3'-hydroxylase                      | 1.14.14.96 | x          | x         |           |           | x         | x         |
| Caffeoylshikimate esterase                            | 3.1.1.-    | x          | x         |           |           |           |           |
| Eugenol synthase                                      | 1.1.1.318  | x          | x         |           |           | x         | x         |
| Isoeugenol synthase                                   | 1.1.1.139  | x          | x         |           |           |           |           |
| Cinnamate beta-D-glucosyltransferase                  | 2.4.1.177  | x          | x         |           |           |           |           |
| Lignins                                               |            |            |           |           |           |           |           |
| Cinnamoyl-CoA reductase                               | 1.2.1.44   | x          | x         | x         | x         | x         |           |
| Cinnamyl alcohol dehydrogenase                        | 1.1.1.195  | x          | x         | x         | x         |           |           |
| Coumarins                                             |            |            |           |           |           |           |           |
| Scopoletin glucosyltransferase                        | 2.4.1.128  | x          | x         | x         | x         |           |           |
| Feruloyl CoA ortho-hydroxylase                        | 1.14.11.61 | x          | x         |           |           |           |           |
| Stilbenoids                                           |            |            |           |           |           |           |           |
| Trans-resveratrol di-O-methyltransferase              | 2.1.1.240  | x          | x         |           |           | x         | x         |
| Flavonoids                                            |            |            |           |           |           |           |           |
| Chalcone synthase                                     | 2.3.1.74   | x          | x         | x         | x         | x         |           |
| NAD(P)H-dependent 6'-deoxychalcone synthase           | 2.3.1.170  | x          | x         |           |           |           |           |
| Chalcone isomerase                                    | 5.5.1.6    | x          | x         | x         | x         |           |           |
| Flavonoid 3'-hydroxylase                              | 1.14.14.82 | x          | x         | x         | x         |           |           |
| Flavonoid 3',5'-hydroxylase                           | 1.14.14.81 | x          | x         |           |           |           |           |
| Flavanone-3-hydroxylase                               | 1.14.11.9  | x          | x         | x         | x         |           |           |
| Flavonol synthase                                     | 1.14.20.6  | x          | x         |           |           |           |           |
| Dihydroflavonol reductase                             | 1.1.1.219  | x          | x         | x         | x         |           |           |
| Leucoanthocyanidin reductase                          | 1.17.1.3   | x          | x         | x         | x         | x         | x         |
| Anthocyanidin synthase                                | 1.14.20.4  | x          | x         | x         | x         |           |           |
| Anthocyanidin reductase                               | 1.3.1.77   | x          | x         | x         | x         |           |           |
| Flavonoid 3',5'-methyltransferase                     | 2.1.1.267  | x          | x         |           |           |           |           |
| Flavonol 3-O-glucosyltransferase                      | 2.4.1.91   | x          | x         |           |           |           |           |
| Anthocyanidin 3-O-glucosyltransferase                 | 2.4.1.115  | x          | x         | x         | x         |           |           |
| Anthocyanin 5-aromatic acyltransferase                | 2.3.1.153  | x          | x         | x         | x         |           |           |
| Anthocyanidin 3-O-glucoside 2''-O-glucosyltransferase | 2.4.1.297  | x          | x         |           |           |           |           |
| Isoflavonoids                                         |            |            |           |           |           |           |           |
| 2-hydroxyisoflavanone dehydratase                     | 4.2.1.105  | x          | x         |           |           |           |           |

---

|                                           |            |   |   |   |   |
|-------------------------------------------|------------|---|---|---|---|
| Isoflavone 2'-hydroxylase                 | 1.14.14.90 | x | x |   |   |
| Isoflavone reductase                      | 1.3.1.45   | x | x | x | x |
| 3,9-dihydroxypterocarpan 6A-monooxygenase | 1.14.14.93 | x | x |   |   |

---

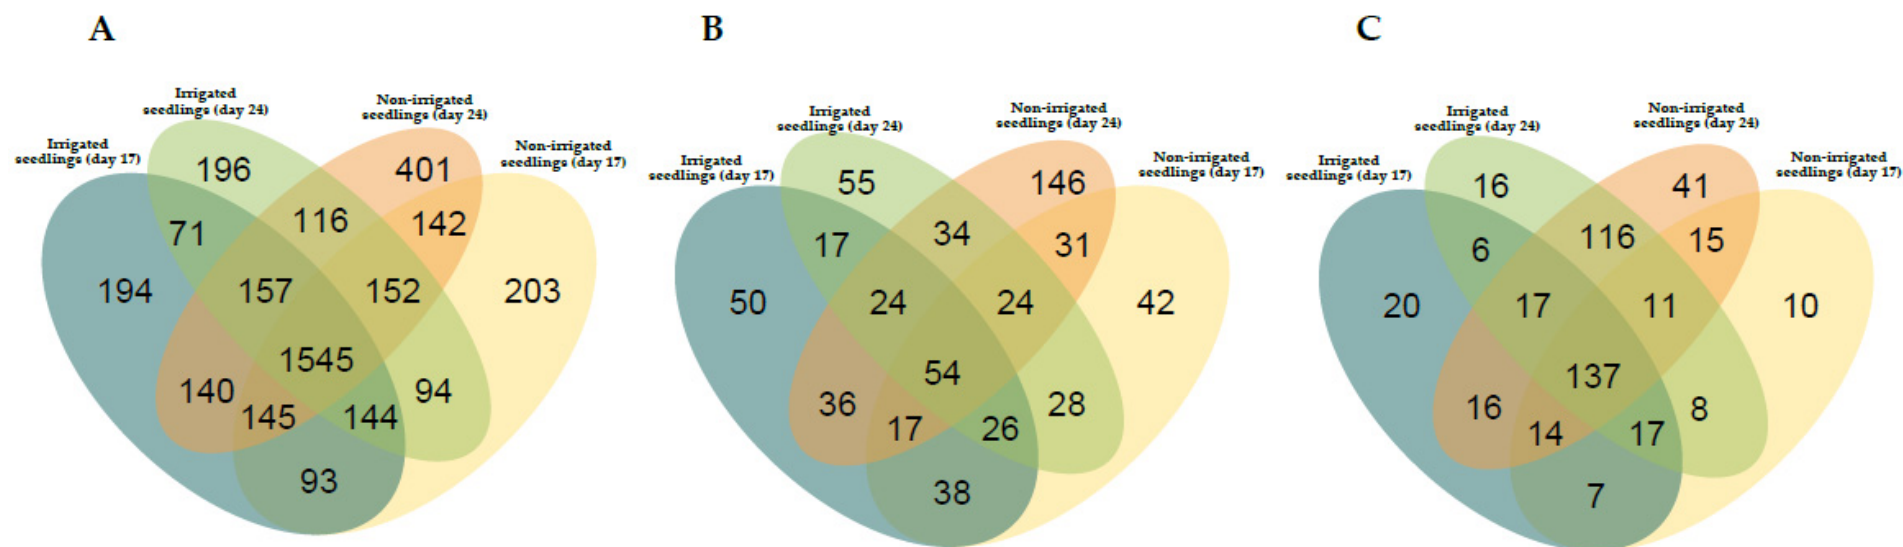

**Figure S1.** Venn diagrams of the total 3934 (A), and 616 variable (B) features, and 342 annotated compounds (C) in irrigated and non-irrigated *Q. ilex* leaf seedlings at both sampling times (days 17 and 24).

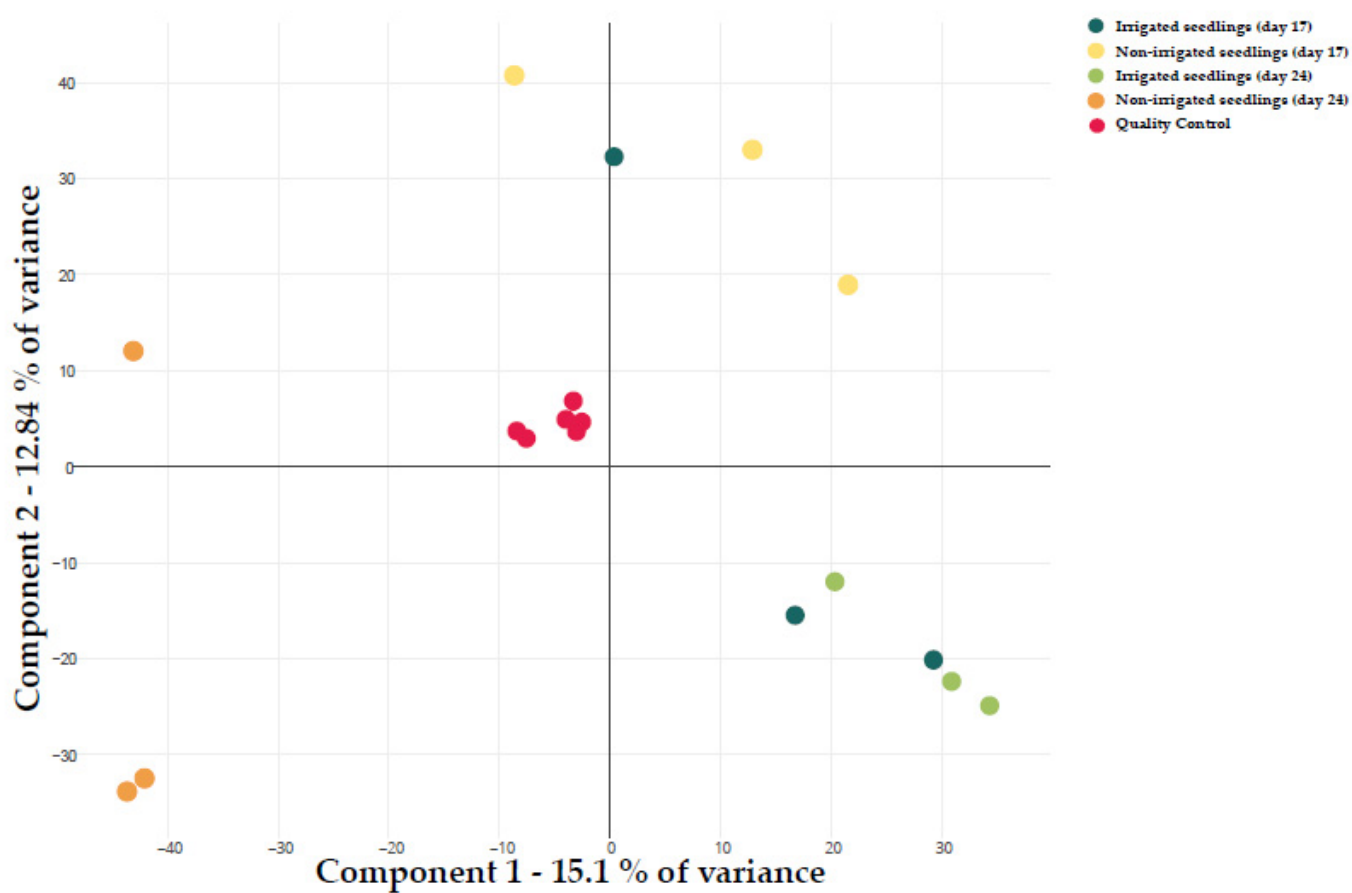

**Figure S2.** PCA analysis of the total dataset of metabolites including the quality control mix (QC).
